# Supplementary material
Source: Springer Nature journal article supplement (http://www.springermedizin.de/resource/supplementary/13054_2013_2215_MOESM4_ESM.pdf/9713836)

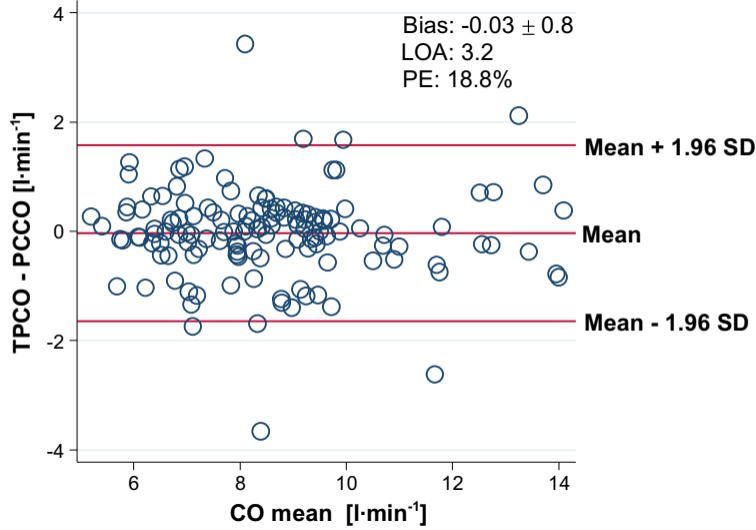

Supplement: MOESM4 [file 9713836]
